## RESEARCH ARTICLE

# Inequalities in the prevalence of cardiovascular disease risk factors in Brazilian slum populations: A cross-sectional study

Jasper J. L. Chan<sup>1\*</sup>, Linh Tran-Nhu<sup>2</sup>, Charlie F. M. Pitcairn<sup>1,3</sup>, Anthony A. Lavery<sup>4</sup>, Matias Mrejen<sup>5</sup>, Julia M. Pescarini<sup>6,7</sup>, Thomas V. Hone<sup>4</sup>

**1** Imperial College School of Public Health, Imperial College London, London, United Kingdom, **2** Division of Biosciences, University College London, London, United Kingdom, **3** Faculty of Public Health and Policy, London School of Hygiene and Tropical Medicine, London, United Kingdom, **4** Public Health Policy Evaluation Unit, School of Public Health, Imperial College London, London, United Kingdom, **5** Instituto de Estudos para Políticas de Saúde (IEPS), São Paulo, SP, Brazil, **6** Centro de Integração de Dados e Conhecimentos para Saúde (Cidacs), Fundação Oswaldo Cruz, Salvador, Brazil, **7** Faculty of Epidemiology & Population Health, London School of Hygiene & Tropical Medicine, London, United Kingdom

\* [jasper.chan17@imperial.ac.uk](mailto:jasper.chan17@imperial.ac.uk)

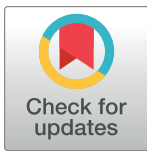

## OPEN ACCESS

**Citation:** Chan JLL, Tran-Nhu L, Pitcairn CFM, Lavery AA, Mrejen M, Pescarini JM, et al. (2022) Inequalities in the prevalence of cardiovascular disease risk factors in Brazilian slum populations: A cross-sectional study. *PLOS Glob Public Health* 2(9): e0000990. <https://doi.org/10.1371/journal.pgph.0000990>

**Editor:** Peter Bai James, Southern Cross University, AUSTRALIA

**Received:** March 20, 2022

**Accepted:** August 9, 2022

**Published:** September 8, 2022

**Peer Review History:** PLOS recognizes the benefits of transparency in the peer review process; therefore, we enable the publication of all of the content of peer review and author responses alongside final, published articles. The editorial history of this article is available here: <https://doi.org/10.1371/journal.pgph.0000990>

**Copyright:** © 2022 Chan et al. This is an open access article distributed under the terms of the [Creative Commons Attribution License](https://creativecommons.org/licenses/by/4.0/), which permits unrestricted use, distribution, and reproduction in any medium, provided the original author and source are credited.

**Data Availability Statement:** All data is from the 2019 Brazilian Health Survey - Pesquisa Nacional de Saúde (PNS). The PNS is publicly available from

## Abstract

### Background

Social and environmental risk factors in informal settlements and slums may contribute to increased risk of cardiovascular disease (CVD). This study assesses the socioeconomic inequalities in CVD risk factors in Brazil comparing slum and non-slum populations.

### Methods

Responses from 94,114 individuals from the 2019 Brazilian National Health Survey were analysed. The United Nations Human Settlements Programme definition of a slum was used to identify slum inhabitants. Six behavioural risk factors, four metabolic risk factors and doctor-diagnosed CVD were analysed using Poisson regression models adjusting for socio-economic characteristics.

### Results

Compared to urban non-slum inhabitants, slum inhabitants were more likely to: have low (less than five days per week) consumption of fruits (APR: 1.04, 95%CI 1.01–1.07) or vegetables (APR: 1.08, 95%CI 1.05–1.12); drink four or more alcoholic drinks per day (APR: 1.05, 95%CI 1.03–1.06); and be physically active less than 150 minutes per week (APR: 1.03, 95%CI 1.01–1.04). There were no differences in the likelihoods of doctor-diagnosed metabolic risk factors or CVD between the two groups in adjusted models. There was a higher likelihood of behavioural and metabolic risk factors among those with lower education, with lower incomes, and the non-White population.

the Brazilian Institute of Geography and Statistics (IBGE): <https://www.ibge.gov.br/estatisticas/sociais/saude/9160-pesquisa-nacional-de-saude.html?=&t=downloads>.

**Funding:** The authors received no specific funding for this work.

**Competing interests:** The authors have declared that no competing interests exist.

## Conclusions

Brazilians living in slums are at higher risk of behavioural risk factors for CVD, suggesting local environments might impact access to and uptake of healthy behaviours.

## Introduction

Development and urbanisation have fundamentally affected demographics and lifestyles globally—especially in low- and middle- income countries (LMICs) [1]. Consequently, chronic non-communicable diseases (NCDs) are now a major health challenge [2]. Cardiovascular disease (CVD) is the leading contributor to global NCD mortality and morbidity—the number one cause of deaths globally and responsible for almost 18 million deaths annually [3]. Nearly 80% of all CVD deaths occur in LMICs, where the annual cost of management and treatment exceeds the total health expenditure per capita [1,4].

CVD stems from a combination of interlinked risk factors [5]. This includes non-modifiable risk factors, such as sex, age, and race [5], however, modifiable behavioural and metabolic risk factors play a larger role [6,7]. Behavioural risk factors include an unhealthy diet (e.g. lacking in fruits and vegetables), physical inactivity, tobacco use and alcohol consumption [5,6,8,9]. These lifestyle risk factors drive increases in intermediate metabolic risk factors such as obesity, hypertension, diabetes and high cholesterol [5,6,8]. Unaddressed, these risk factors increase the risk of CVD events such as heart disease or stroke [10–12].

Individuals living in slums and informal settlements are a growing population—nearly one billion people worldwide now live in slums, a figure expected to double by 2030 [13,14]. Slums have grown sizeably in LMICs due to inadequate urban planning and rapid urbanisation [13,15]. Slums are characterised by poverty, overcrowding, inadequate housing and limited access to safe water and sanitation [15–17]. There is also evidence that individuals living within them are at greater risk of CVD and have higher rates of behavioural CVD risk factors compared to populations in formal urban or rural settlements [18–21]. However, the health profiles and risk factors of slum populations are infrequently studied [13,22,23].

The wider social determinants of health are important determinants of CVD and associated risk factors [24]. Individuals of lower socioeconomic status (SES) experience increased morbidity and mortality on average [25]. Lower income, lower educational attainment, unemployment, and living in disadvantaged areas is associated with higher rates of CVD [26–28]. In many countries, the high costs of treating and managing CVDs can drive individuals and families into poverty, worsening SES, and passing disadvantage from one generation to the next [1,4,29,30]. Much of the literature on CVD and SES inequalities comes from high-income countries [28,31]. However, it is important to generate evidence from LMICs where globalisation has rapidly changed lifestyles in recent decades—there are large inequalities and sizeable slum populations, and access to high-quality healthcare is not universal [14,32].

Brazil is a country with large health and social inequalities [22,33]. Like many other countries, an aging population, obesity, unhealthy diets, and physical inactivity have contributed to a rising burden of CVDs—responsible for 28% of all NCD deaths in Brazil in 2016 [12,34,35]. Brazil is the country with the greatest degree of wealth inequality in South America where the majority of wealth belongs to the top one percent [36,37], and over a quarter of the population live in poverty [38]. Additionally, over 16% of Brazil's urban population reside in slum settlements (*favelas*) [21,22,39]. However, few studies have examined the CVD risk factors and prevalence in these settings [17,22]. National studies demonstrate socioeconomic inequalities

in NCD risk factors and health behaviours [12,40]. For example, rural populations have lower average incomes, are more exposed to infectious diseases, and face greater barriers to accessing healthcare. However, there are no country-wide studies comparing behavioural and metabolic CVD risk factors between rural, slum and non-slum urban inhabitants. Better knowledge of slum population health and their CVD risk factors is important for making progress towards the United Nations Sustainable Development Goals (SDGs) which include targets for reducing premature NCDs deaths (SDG 3), reducing inequality within countries (SDG 10), and upgrading slums (SDG 11) [41].

This study assesses the prevalence of behavioural and metabolic CVD risk factors across socioeconomic and demographic groups in Brazil in 2019. It investigates the associations between socioeconomic inequalities and the prevalence of CVD and its risk factors, specifically examining the inequalities between slum and non-slum inhabitants.

## Methods

### Ethics statement

Ethics approval for the PNS 2019 itself was approved by Brazil's National Research Ethics Committee/National Health Council (opinion no. 3.529.376) with informed consent obtained for all respondents. Ethics approval for this specific study was not required as it utilised anonymised data in the public domain.

### Study design

This is a cross-sectional analysis of the 2019 Brazilian National Health Survey—*Pesquisa Nacional de Saúde* (PNS).

### Data source

Responses from the 2019 PNS were obtained from the website of the Brazilian Institute of Geography and Statistics (IBGE). The PNS is a country-wide household-based survey conducted by IBGE and the Ministry of Health. It collects information on the health, healthcare access and usage, and lifestyles of the Brazilian population [42]. A three-stage probability sample selection process was used. First, primary sampling units (PSU) composed of one or more census tracts were selected by random sampling. Second, 12–18 households were randomly selected from each PSU. Third and finally, one individual aged 15 years or older was selected from each household for a computer-assisted personal interview. Interviewed participants answered questionnaires on housing, socioeconomic and demographic characteristics, health status and behaviours. The PNS is publicly available from IBGE: <https://www.ibge.gov.br/estatisticas/sociais/saude/9160-pesquisa-nacional-de-saude.html?=&t=downloads>.

A total of 293,725 individuals from 108,457 households were surveyed across Brazil. Of these, 94,114 individuals answered the individual questionnaires and were included in this study. Responses were weighted to be representative of the national Brazilian population [43].

### Outcomes

Eleven binary outcomes, including ten modifiable risk factors and doctor-diagnosed CVD, were derived as outcomes in this analysis. The risk factors were divided into six behavioural and four metabolic ones. Risk factors were chosen based on evidence of their association with CVD [2,5–8]. The six behavioural risk factors were self-reported: low weekly consumption of vegetables (<5 days per week); low weekly consumption of fruits (<5 days per week); high weekly consumption of red meat ( $\geq 3$  days per week); currently smoking tobacco; heavy

consumption of alcoholic drinks ( $\geq 4$  drinks per day); and low weekly physical activity ( $< 150$  minutes per week). The categorisation for alcohol consumption was based on evidence from the United States National Institute on Alcohol Abuse and Alcoholism, which defined heavy alcohol consumption as four or more drinks per day [44–46]. For physical activity, the categorisation was based on the World Health Organization (WHO) recommendation of at least 150 minutes per week of moderate-intensity physical activity [47].

Four metabolic risk factor variables were included: overweight (body mass index (BMI) over  $25\text{kg/m}^2$ ) [48]; doctor-diagnosed hypertension; doctor-diagnosed diabetes; and doctor-diagnosed high cholesterol. Both height and weight were measured at the interview to determine BMI. The doctor-diagnosed conditions were determined in the interview as: “Has a doctor ever diagnosed you with. . .”. Doctor-diagnosed CVD was also included as an outcome and was defined as an individual who reported ever having been diagnosed with either heart disease or stroke.

### Variables of interest

The United Nations Human Settlements Programme (UN-Habitat) definition of slums was used to identify respondents living in slums and has been used in similar studies in Brazil [49,50]. It defines slums as an environment where inhabitants lack access to one or more of these conditions: improved water source, improved sanitation facilities, sufficient living area, housing durability and security of tenure (Table 1) [51]. Data on a lack of security of tenure was not available and not included. In this study, if an individual met any of the criteria and were living in an urban area, they were considered slum residents. Those who did not meet the criteria were categorised as either urban non-slum or rural residents.

Ten socioeconomic and demographic variables were derived from the survey: area (slum, urban non-slum, rural); sex (male, female); age (15–29 years, 30–39, 40–49, 50–59, 60–69, 70 or older); self-reported race/ethnicity (White, Black, *Pardo*/mixed (Brown), other (Asian, Indigenous or not reported)); highest level of education (illiterate, elementary education, high school education, higher education); currently in the workforce (yes, no); household income per capita ( $\leq$  half minimum wage,  $>$  half but  $\leq 1$  minimum wage,  $> 1$  but  $\leq 2$  minimum wage,  $> 2$  minimum wage); household registered to the Family Health Strategy (FHS) (yes, no, do not know); private healthcare (yes, no); and the last time a doctor was consulted ( $\leq 1$  year,  $> 1$  but  $\leq 2$  years,  $> 2$  years or never consulted). Those who identified as Asian or Indigenous were grouped together with those who ignored the question due to small numbers. In 2020, the annual minimum wage in Brazil was USD 5,198.40 after adjusting for purchasing power [53]. The FHS is Brazil’s main primary healthcare program and consists of primary care services delivered through multidisciplinary teams assigned to a certain area, comprising of approximately 3,500 individuals [54,55].

### Data analysis

All analyses accounted for clustered sampling of the survey and weighted for non-response. Descriptive data analysis explored the prevalence of the socioeconomic characteristics, behavioural risk factors, metabolic risk factors and CVD outcomes in the study population. Weighted prevalence estimates (%) and 95% confidence intervals (95% CIs) are reported. Prevalence estimates were explored across slum, urban non-slum and rural populations.

Adjusted Poisson regression models were used to analyse the associations between demographic and socioeconomic variables with different CVD outcomes. Poisson regression models were chosen due to the high prevalence of many risk factors and to obtain prevalence ratios which are more interpretable. Models were repeated for each of the eleven outcomes, and all

**Table 1. Slum residence definition.**

| UN-Habitat definition                   | Variable                    | Full PNS survey question                                                                           | Responses considered for slums                                        |
|-----------------------------------------|-----------------------------|----------------------------------------------------------------------------------------------------|-----------------------------------------------------------------------|
| Lack of access to improved water source | Water supply                | What is the main form of water supply for this household?                                          | Shallow, water table or <i>cacimba</i><br>Source or spring<br>Another |
|                                         | Water distribution network  | Is this household connected to the general water distribution network?                             | No                                                                    |
|                                         | Arriving water              | How does the water used in this household arrive?                                                  | Not piped                                                             |
| Lack of access to improved sanitation   | Bathroom or sanitation room | How many bathrooms or sanitation rooms for residents to use are located on the ground or property? | None                                                                  |
|                                         | Dejections                  | Do residents use a toilet or hole located on the ground or property for dejections?                | No                                                                    |
|                                         | Drainage                    | Where does the sullage from the bathroom, toilet or hole go?                                       | Rudimentary pit<br>Ditch<br>River, lake, stream or sea<br>Another     |
| Lack of sufficient living area          | Number of rooms             | How many rooms does this household have?                                                           | ≥3 people per room*                                                   |
|                                         | Number of household members | Number of household members                                                                        |                                                                       |
| Lack of housing durability              | Wall material               | What is the predominant material on the external walls of the household?                           | Uncoated rammed earth<br>Harnessed wood                               |
|                                         | Roof material               | What is the predominant material on the roof of the household?                                     | Zinc, aluminium or sheet metal                                        |
|                                         | Floor material              | What is the predominant material on the floor of the household?                                    | Earth                                                                 |

This was based on the United Nations Human Settlements Programme (UN-Habitat) definition of slum households with indicators mapped to questions from the 2019 Brazilian National Health Survey, *Pesquisa Nacional de Saúde* (PNS).

\*Overcrowding is defined by UN-Habitat as three or more people per room [52].

<https://doi.org/10.1371/journal.pgph.0000990.t001>

models were adjusted for location of residence (urban slum, urban non-slum, rural), sex, age, race/ethnicity, educational level, employment status, and household income per capita. Collinearity of variables were tested and found to be unproblematic as all variance inflation factors were less than 2. Adjusted prevalence ratios (APRs) with their respective 95% CIs and *p*-value are reported. The unadjusted regression models can be found in the supporting information (S1 and S2 Tables). In supplementary analyses, differential associations between slum residence and the eleven outcomes were explored across the regions of Brazil. Models were repeated with interactions between the variable for location of residence (urban slum, urban

**Table 2. Distribution of study population’s area of residence.**

| Area           | n      | Weighted % | 95%CI     |
|----------------|--------|------------|-----------|
| Slum           | 16,627 | 14.4       | 13.7–15.0 |
| Urban non-slum | 56,082 | 71.6       | 70.8–72.4 |
| Rural          | 21,405 | 14.1       | 13.7–14.5 |

Source: Brazilian National Health Survey *Pesquisa Nacional de Saúde* (PNS) 2019. Shows numbers of individuals (n) and the weighted percentage (%) prevalence estimates. 95%CI—95% confidence interval. Percentages may not equal 100% due to rounding.

<https://doi.org/10.1371/journal.pgph.0000990.t002>

non-slum, rural) and region of residence (North, Northeast, Southeast, South and Central west). Prediction prevalence estimates from interacted Poisson regression models were plotted (S1 Fig).

Stata/IC 16.1 was used to analyse the data.

## Results

The responses from 94,114 individuals were included. According to the UN-Habitat definition, 14.4% (95%CI 13.7–15.0) of the Brazilian population are slum residents (Table 2).

The self-reported prevalence and distribution of the socioeconomic and demographic characteristics is shown in Table 3. The average age of the participants was 46.2 years, with individuals living in slums generally younger. Slums had the highest prevalence of participants identifying as Black (12.1%) or *Pardo*/mixed (57.0%). In terms of education, nearly half of slum populations reported having high school (36.9%) or higher education (11.3%) which was lower than urban non-slums populations but higher than rural populations. Rural populations had the greatest proportion of illiteracy (13.3%) and over half of the population had elementary education (56.9%) but did not progress further with only 4.3% having higher education. Rural populations also had the greatest proportion of unemployment (44.2%) compared to slums and urban non-slums (37.6% and 33.7% respectively). Over two thirds of the population in slums (69.4%) earned the minimum wage or less, compared to 78.5% in rural areas and 43.8% in urban non-slum areas. In slums, 70.3% of households were registered with the FHS compared 78.6% in rural areas and 56.7% in urban non-slums. Conversely, urban non-slums had the highest access to private healthcare (33.3%) compared to 12.8% of respondents in slums and 6.0% of rural respondents. The proportion of individuals who had a doctor consultation within the last year was highest in urban non-slums (82.6% of respondents) compared to 75.2% in slums and 70.7% in rural areas.

The prevalence of modifiable CVD risk factors was examined by area of residence (Fig 1). Compared to urban non-slum populations, individuals in slums and rural areas had a higher (unadjusted) prevalence of: low fruits consumption (61.7% (slum) and 64.9% (rural), compared to 52.8% (urban non-slum)); low vegetables consumption (53.0%, 57.3%, and 42.2%); smoking (12.8%, 12.9%, and 11.9%); heavy alcohol consumption (82.9%, 81.0%, and 74.4%); and physical inactivity (76.1%, 83.1%, and 70.1%). Only for high red meat consumption, was the prevalence highest in urban non-slums (65.8% (urban non-slum), 60.0% (slum), and 62.8% (rural)). For metabolic CVD risk factors (Fig 2), 55.4% of slum residents and 57.3% of urban non-slum residents were overweight compared to rural residents (49.1%). For doctor-diagnosed hypertension, diabetes, high cholesterol and CVD, the prevalence was higher in urban environments than rural areas.

Table 4 shows results from adjusted Poisson regression models on behavioural CVD risk factors. The unadjusted regression can be found in S1 Table. In fully-adjusted models and compared to urban non-slum populations, residents of slums had: 8.3% higher prevalence of having low vegetables consumption (APR: 1.083, 95%CI 1.048–1.119); 3.7% higher prevalence of having low fruits consumption (APR: 1.037, 95%CI 1.010–1.065); 4.5% higher prevalence of having heavy alcohol consumption (APR: 1.045, 95%CI 1.028–1.062); and 2.5% higher prevalence of being physically inactive (APR: 1.025, 95%CI 1.007–1.044). Individuals from rural areas also had a higher prevalence of behavioural risk factors compared to urban non-slums. However, both rural and slum inhabitants had a lower prevalence of smoking (APR: 0.806, 95%CI 0.742–0.875 and APR: 0.920, 95%CI 0.847–0.999 respectively). Regarding other SES factors, women had a higher prevalence of high alcohol consumption (APR: 1.046, 95%CI 1.032–1.061) and being physically inactive (APR: 1.079, 95%CI 1.062–1.096), but had a lower

Table 3. Socioeconomic and demographic characteristics of study population by area of residence.

|                                                           | n      | Slum<br>Weighted % (95%CI) | Urban non-slum<br>Weighted % (95%CI) | Rural<br>Weighted % (95%CI) |
|-----------------------------------------------------------|--------|----------------------------|--------------------------------------|-----------------------------|
| <b>Sex</b>                                                |        |                            |                                      |                             |
| Male                                                      | 44,752 | 46.4 (45.2–47.7)           | 45.9 (45.2–46.7)                     | 53.5 (52.2–54.8)            |
| Female                                                    | 49,362 | 53.6 (52.3–54.8)           | 54.1 (53.3–54.8)                     | 46.5 (45.2–47.8)            |
| <b>Age</b>                                                |        |                            |                                      |                             |
| 15–29                                                     | 18,648 | 28.8 (27.5–30.2)           | 25.6 (24.8–26.4)                     | 27.9 (26.6–29.2)            |
| 30–39                                                     | 18,904 | 20.2 (19.2–21.2)           | 19.9 (19.3–20.5)                     | 19.2 (18.4–20.1)            |
| 40–49                                                     | 17,282 | 17.6 (16.6–18.5)           | 17.2 (16.6–17.7)                     | 16.8 (16.2–17.5)            |
| 50–59                                                     | 16,136 | 16.2 (15.4–17.2)           | 16.4 (15.9–16.9)                     | 15.0 (14.3–15.7)            |
| 60–69                                                     | 12,799 | 9.4 (8.8–10.1)             | 11.9 (11.5–12.4)                     | 11.4 (10.7–12.1)            |
| 70+                                                       | 10,345 | 7.8 (7.2–8.4)              | 9.0 (8.6–9.5)                        | 9.7 (9.2–10.3)              |
| <b>Race/ethnicity</b>                                     |        |                            |                                      |                             |
| White                                                     | 34,320 | 29.7 (28.2–31.2)           | 47.7 (46.8–48.7)                     | 32.1 (30.8–33.5)            |
| Black                                                     | 10,730 | 12.1 (11.3–13.0)           | 11.3 (10.8–11.9)                     | 10.9 (10.1–11.9)            |
| <i>Pardo</i> /mixed (Brown)                               | 47,660 | 57.0 (55.5–58.6)           | 39.3 (38.4–40.1)                     | 56.0 (54.6–57.5)            |
| Other                                                     | 1,404  | 1.2 (1.0–1.6)              | 1.7 (1.5–1.9)                        | 0.9 (0.7–1.1)               |
| <b>Education level (complete or incomplete)</b>           |        |                            |                                      |                             |
| Illiterate                                                | 7,870  | 8.5 (7.7–9.4)              | 3.8 (3.6–4.1)                        | 13.3 (12.7–14.1)            |
| Elementary education                                      | 36,829 | 43.3 (41.8–44.7)           | 32.2 (31.4–33.0)                     | 56.9 (55.6–58.1)            |
| High school education                                     | 31,128 | 36.9 (35.6–38.3)           | 39.4 (38.6–40.1)                     | 25.5 (24.3–26.7)            |
| Higher education                                          | 18,287 | 11.3 (10.5–12.1)           | 24.6 (23.6–25.5)                     | 4.3 (3.9–4.7)               |
| <b>Currently employed</b>                                 |        |                            |                                      |                             |
| Yes                                                       | 59,172 | 62.4 (61.2–63.6)           | 66.3 (65.6–67.1)                     | 55.8 (54.7–57.0)            |
| No                                                        | 34,942 | 37.6 (36.4–38.8)           | 33.7 (33.0–34.4)                     | 44.2 (43.0–45.3)            |
| <b>Household income per capita</b>                        |        |                            |                                      |                             |
| ≤ half minimum wage                                       | 24,592 | 34.3 (32.8–35.8)           | 16.3 (15.6–17.0)                     | 46.4 (45.2–47.7)            |
| > half but ≤ 1 minimum wage                               | 27,417 | 35.1 (33.9–36.3)           | 27.5 (26.8–28.3)                     | 32.0 (30.9–33.1)            |
| > 1 but ≤ 2 minimum wage                                  | 23,248 | 21.6 (20.4–22.7)           | 31.0 (30.3–31.8)                     | 16.0 (15.1–16.9)            |
| > 2 minimum wage                                          | 18,833 | 9.1 (8.4–9.9)              | 25.2 (24.2–26.2)                     | 5.6 (5.2–6.1)               |
| <b>Household registered to the Family Health Strategy</b> |        |                            |                                      |                             |
| Yes                                                       | 59,358 | 70.3 (68.4–72.2)           | 56.7 (55.3–58.2)                     | 78.6 (76.9–80.2)            |
| No                                                        | 23,424 | 19.7 (18.1–21.4)           | 31.1 (29.8–32.4)                     | 13.0 (11.8–14.4)            |
| Do not know                                               | 11,332 | 10.0 (9.1–11.0)            | 12.2 (11.5–12.9)                     | 8.4 (7.4–9.4)               |
| <b>Private healthcare</b>                                 |        |                            |                                      |                             |
| Yes                                                       | 21,333 | 12.8 (11.9–13.9)           | 33.3 (32.3–34.4)                     | 6.0 (5.3–6.6)               |
| No                                                        | 72,781 | 87.2 (86.1–88.1)           | 66.7 (65.6–67.7)                     | 94.0 (93.4–94.7)            |
| <b>The last time a doctor was consulted</b>               |        |                            |                                      |                             |
| ≤1 year                                                   | 73,561 | 75.2 (74.1–76.4)           | 82.6 (81.9–83.2)                     | 70.7 (69.4–72.0)            |
| >1 but ≤2 years                                           | 9,885  | 11.1 (10.4–11.9)           | 9.1 (8.7–9.6)                        | 12.1 (11.3–12.9)            |
| >2 years or never consulted                               | 10,668 | 13.6 (12.6–14.6)           | 8.3 (7.9–8.7)                        | 17.2 (16.1–18.3)            |

Source: Brazilian National Health Survey *Pesquisa Nacional de Saúde* (PNS) 2019. Shows numbers of individuals (n) and the weighted percentage (%) prevalence estimates. 95%CI—95% confidence interval. Percentages may not equal 100% due to rounding.

<https://doi.org/10.1371/journal.pgph.0000990.t003>

prevalence of low fruits and vegetables consumption (APR: 0.844, 95% CI 0.827–0.861 and APR: 0.835, 95%CI 0.814–0.856 respectively), high red meat consumption (APR: 0.855, 95%CI 0.841–0.870), and smoking (APR: 0.637, 95%CI 0.599–0.677). There was a higher prevalence

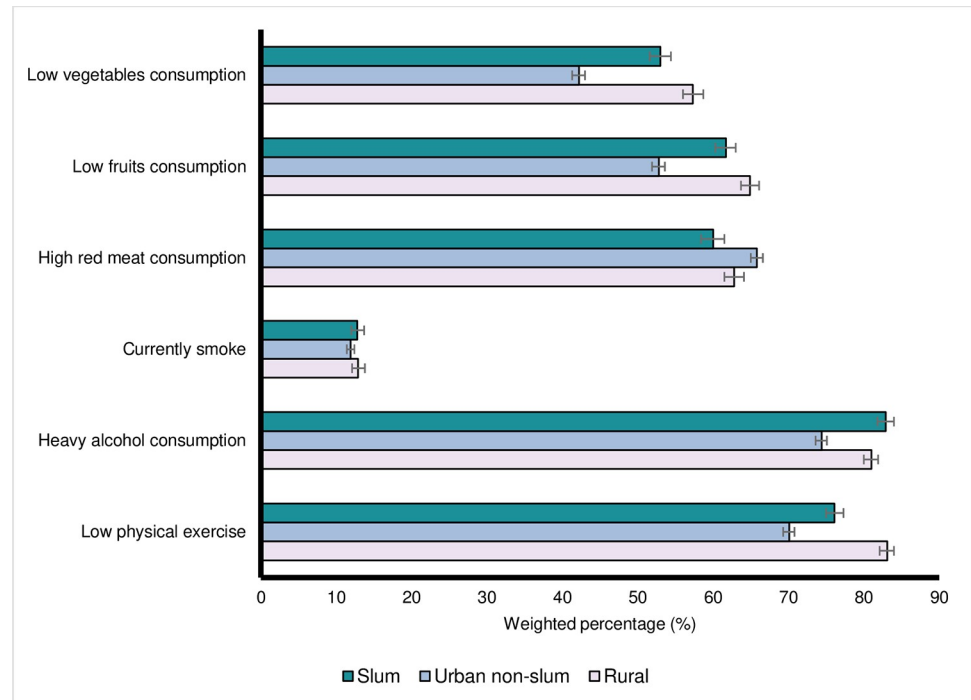

**Fig 1. Weighted prevalence of self-reported cardiovascular disease (CVD) behavioural risk factors by area of residence.** Source: Brazilian National Health Survey *Pesquisa Nacional de Saúde* (PNS) 2019. Low Vegetables Consumption—Vegetables consumption <5 days per week; Low Fruits Consumption—Fruits consumption <5 days per week; High Red Meat Consumption—Red meat consumption  $\geq 3$  days per week; Currently Smoke—Currently smoke tobacco; Heavy Alcohol Consumption—Alcohol consumption  $\geq 4$  per day; Low Physical Exercise—Exercise <150 minutes per week.

<https://doi.org/10.1371/journal.pgph.0000990.g001>

of low fruits and vegetables consumption and heavy alcohol use among the non-white population. Individuals with higher levels of education had a lower prevalence of low levels of fruits and vegetables consumption, smoking tobacco, consuming high amounts of alcohol, or being physically inactive. Generally, as household income increased, the prevalence of behavioural CVD risk factors decreased.

Table 5 shows the adjusted Poisson regression results for metabolic risk factors for CVD and doctor-diagnosed CVD. The unadjusted regression can be found in S2 Table. In fully-adjusted models, there was no statistically significant difference in all self-reported doctor-diagnosed conditions (overweight, hypertension, diabetes, high cholesterol and CVD) between slums and urban non-slums. However, individuals living in rural areas had a lower prevalence of all metabolic risk factors and CVD. Females had a higher prevalence of hypertension (APR: 1.262, 95%CI 1.218–1.309), diabetes (APR: 1.097, 95%CI 1.013–1.189) and high cholesterol (APR: 1.413, 95%CI 1.334–1.497). The prevalence of having hypertension was significantly higher in the non-white population. Notably, there were no significant differences in the prevalence of high cholesterol and CVD across education levels. Across education levels, illiterate individuals had a lower prevalence of being overweight, whilst increasing educational attainment was associated with a lower prevalence of hypertension and diabetes. Unemployed individuals had a higher prevalence of hypertension, diabetes, high cholesterol, and CVD yet had a lower prevalence of being overweight. There were no clear patterns by household income, except for high cholesterol which was associated with increasing income.



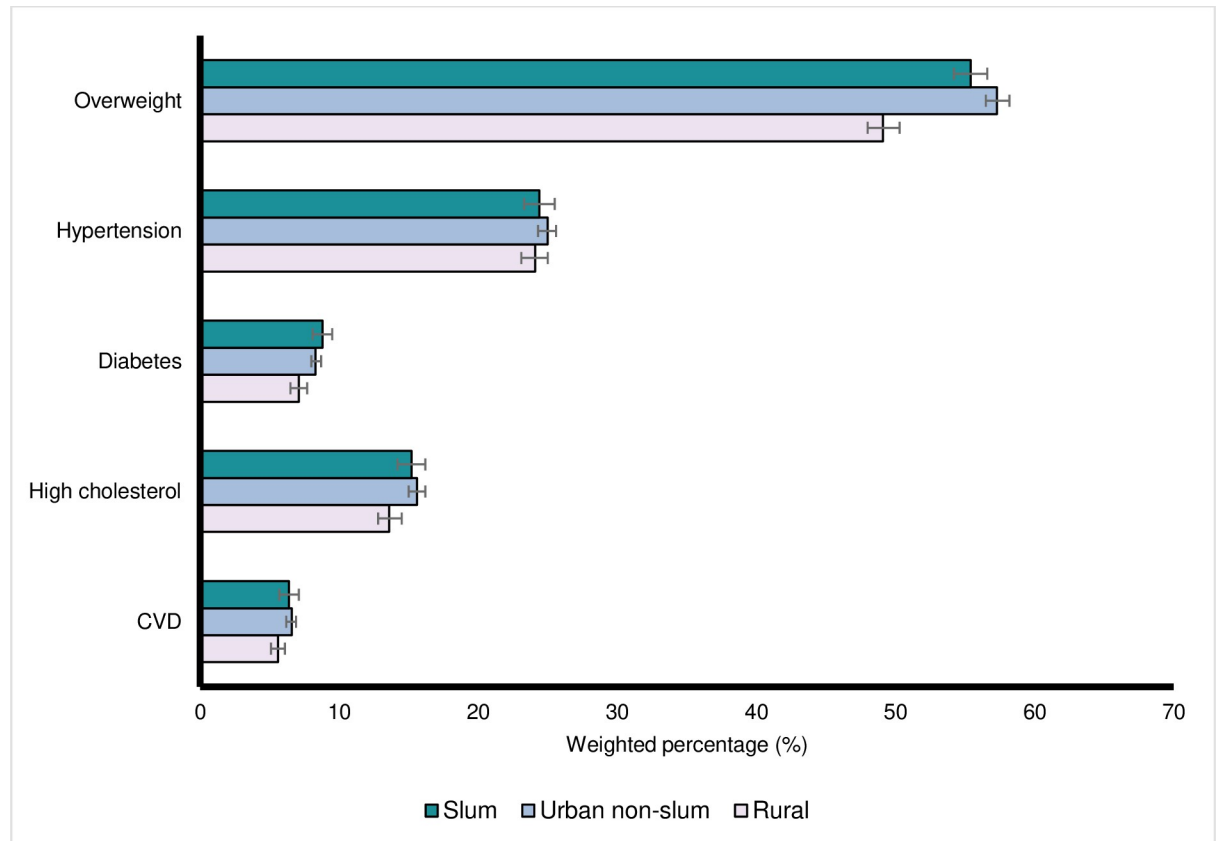

**Fig 2. Weighted prevalence of self-reported cardiovascular disease (CVD) metabolic risk factors and doctor-diagnosed CVD by area of residence.** Source: Brazilian National Health Survey *Pesquisa Nacional de Saúde* (PNS) 2019. CVD—doctor-diagnosed with either heart disease or stroke.

<https://doi.org/10.1371/journal.pgph.0000990.g002>

When examining the results by region, there were quite large differences across Brazil (S1 Fig). Compared to the wealthier South, Southeast and Central west regions, the North and Northeast regions had generally lower levels of vegetable consumption, lower red meat consumption, lower smoking, and higher excessive drinking. There was a general trend of lower hypertension and CVD.

By region and area of residence, many confidence intervals were overlapping or showed similar trends to the overall pooled regressions. However, there were a few notable findings. Compared to non-slum urban and rural populations, slum populations in the North had higher vegetable consumption, whilst slum populations in the Northeast and South-east had lower red meat consumption. Over 85% of rural populations in the central west had high red meat consumption compared to ~50% of rural northern populations. Excessive drinking varied from ~87% of non-slum urban populations in the North to ~66% of rural populations in the South. Across the regions, rural populations were more likely to have low physical activity, and in the North and Northeast rural populations were less likely to have a BMI over 25.

## Discussion

This study found that, compared to non-slum urban populations, Brazilian slum and rural populations had a greater likelihood of having many behavioural CVD risk factors (including low fruits and vegetables consumption, heavy alcohol consumption (only slum) and physical

Table 4. Poisson regression models on the association between slums and behavioural cardiovascular disease risk factors.

|                                    | Low Vegetables Consumption | Low Fruits Consumption | High Red Meat Consumption | Currently Smoke | Heavy Alcohol Consumption | Low Physical Exercise |
|------------------------------------|----------------------------|------------------------|---------------------------|-----------------|---------------------------|-----------------------|
|                                    | APR                        | APR                    | APR                       | APR             | APR                       | APR                   |
|                                    | 95%CI                      | 95%CI                  | 95%CI                     | 95%CI           | 95%CI                     | 95%CI                 |
| <b>Area</b>                        |                            |                        |                           |                 |                           |                       |
| Non-slum urban (Ref)               | 1                          | 1                      | 1                         | 1               | 1                         | 1                     |
| Slum                               | 1.083***                   | 1.037**                | 0.962**                   | 0.920*          | 1.045***                  | 1.025**               |
|                                    | 1.048–1.119                | 1.010–1.065            | 0.934–0.990               | 0.847–0.999     | 1.028–1.062               | 1.007–1.044           |
| Rural                              | 1.100***                   | 1.037**                | 1.036*                    | 0.806***        | 0.996                     | 1.077***              |
|                                    | 1.067–1.135                | 1.012–1.062            | 1.009–1.063               | 0.742–0.875     | 0.981–1.011               | 1.060–1.095           |
| <b>Sex</b>                         |                            |                        |                           |                 |                           |                       |
| Male (Ref)                         | 1                          | 1                      | 1                         | 1               | 1                         | 1                     |
| Female                             | 0.835***                   | 0.844***               | 0.855***                  | 0.637***        | 1.046***                  | 1.079***              |
|                                    | 0.814–0.856                | 0.827–0.861            | 0.841–0.870               | 0.599–0.677     | 1.032–1.061               | 1.062–1.096           |
| <b>Age</b>                         |                            |                        |                           |                 |                           |                       |
| 15–29 (Ref)                        | 1                          | 1                      | 1                         | 1               | 1                         | 1                     |
| 30–39                              | 0.830**                    | 0.920***               | 0.980                     | 1.225***        | 1.007                     | 1.101***              |
|                                    | 0.799–0.863                | 0.893–0.947            | 0.956–1.004               | 1.101–1.364     | 0.984–1.030               | 1.073–1.131           |
| 40–49                              | 0.753***                   | 0.821***               | 0.936***                  | 1.261***        | 0.983                     | 1.120***              |
|                                    | 0.724–0.783                | 0.795–0.848            | 0.912–0.961               | 1.129–1.407     | 0.960–1.007               | 1.091–1.150           |
| 50–59                              | 0.696***                   | 0.741***               | 0.865***                  | 1.492***        | 0.973*                    | 1.155***              |
|                                    | 0.667–0.727                | 0.715–0.768            | 0.840–0.890               | 1.335–1.666     | 0.951–0.996               | 1.125–1.187           |
| 60–69                              | 0.668***                   | 0.651***               | 0.853***                  | 1.364***        | 0.977*                    | 1.196***              |
|                                    | 0.638–0.701                | 0.624–0.679            | 0.825–0.881               | 1.214–1.533     | 0.953–1.001               | 1.161–1.231           |
| 70+                                | 0.593***                   | 0.544***               | 0.851***                  | 0.729***        | 1.007                     | 1.293***              |
|                                    | 0.561–0.627                | 0.517–0.572            | 0.818–0.886               | 0.629–0.845     | 0.980–1.034               | 1.254–1.334           |
| <b>Race/ethnicity</b>              |                            |                        |                           |                 |                           |                       |
| White (Ref)                        | 1                          | 1                      | 1                         | 1               | 1                         | 1                     |
| Black                              | 1.129***                   | 1.057**                | 0.965*                    | 1.007           | 1.059***                  | 0.976*                |
|                                    | 1.084–1.176                | 1.023–1.093            | 0.936–0.994               | 0.909–1.115     | 1.033–1.084               | 0.954–0.999           |
| Pardo/mixed (Brown)                | 1.096***                   | 1.026*                 | 0.959***                  | 1.009           | 1.071***                  | 0.975**               |
|                                    | 1.063–1.131                | 1.002–1.050            | 0.941–0.977               | 0.941–1.082     | 1.055–1.087               | 0.958–0.991           |
| Other                              | 1.020                      | 1.007                  | 0.866**                   | 1.033           | 1.070                     | 1.030                 |
|                                    | 0.891–1.167                | 0.902–1.123            | 0.783–0.958               | 0.808–1.320     | 0.981–1.168               | 0.964–1.101           |
| <b>Education level</b>             |                            |                        |                           |                 |                           |                       |
| Illiterate (Ref)                   | 1                          | 1                      | 1                         | 1               | 1                         | 1                     |
| Elementary education               | 0.797***                   | 0.818***               | 1.107***                  | 0.810***        | 0.941***                  | 0.976*                |
|                                    | 0.764–0.831                | 0.790–0.847            | 1.055–1.161               | 0.735–0.892     | 0.925–0.956               | 0.957–0.996           |
| High school education              | 0.761***                   | 0.762***               | 1.122***                  | 0.495***        | 0.917***                  | 0.884***              |
|                                    | 0.727–0.797                | 0.734–0.792            | 1.068–1.179               | 0.441–0.557     | 0.898–0.936               | 0.862–0.906           |
| Higher education                   | 0.667***                   | 0.651***               | 1.117***                  | 0.400***        | 0.828***                  | 0.752***              |
|                                    | 0.628–0.709                | 0.619–0.684            | 1.060–1.178               | 0.345–0.465     | 0.804–0.852               | 0.727–0.778           |
| <b>Currently employed</b>          |                            |                        |                           |                 |                           |                       |
| Yes (Ref)                          | 1                          | 1                      | 1                         | 1               | 1                         | 1                     |
| No                                 | 1.039**                    | 0.980                  | 0.941***                  | 0.798***        | 1.095***                  | 0.946***              |
|                                    | 1.010–1.068                | 0.957–1.004            | 0.920–0.963               | 0.740–0.859     | 1.078–1.113               | 0.928–0.964           |
| <b>Household income per capita</b> |                            |                        |                           |                 |                           |                       |
| ≤ half minimum wage (Ref)          | 1                          | 1                      | 1                         | 1               | 1                         | 1                     |

(Continued)

Table 4. (Continued)

|                               | Low Vegetables Consumption | Low Fruits Consumption | High Red Meat Consumption | Currently Smoke | Heavy Alcohol Consumption | Low Physical Exercise |
|-------------------------------|----------------------------|------------------------|---------------------------|-----------------|---------------------------|-----------------------|
|                               | APR                        | APR                    | APR                       | APR             | APR                       | APR                   |
|                               | 95%CI                      | 95%CI                  | 95%CI                     | 95%CI           | 95%CI                     | 95%CI                 |
| > half but ≤ 1 minimum wage   | 0.892***                   | 0.929***               | 1.165***                  | 0.911*          | 0.990                     | 0.951***              |
|                               | 0.865–0.919                | 0.906–0.953            | 1.134–1.197               | 0.838–0.991     | 0.973–1.006               | 0.935–0.968           |
| > 1 but ≤ 2 minimum wage      | 0.767***                   | 0.846***               | 1.241***                  | 0.832***        | 0.944***                  | 0.917***              |
|                               | 0.739–0.796                | 0.821–0.871            | 1.205–1.278               | 0.757–0.914     | 0.926–0.963               | 0.898–0.937           |
| > 2 minimum wage              | 0.649***                   | 0.721***               | 1.264***                  | 0.782***        | 0.851***                  | 0.812***              |
|                               | 0.615–0.685                | 0.689–0.754            | 1.222–1.307               | 0.696–0.877     | 0.829–0.873               | 0.789–0.837           |
| <b>Number of observations</b> | 90,824                     | 90,824                 | 90,824                    | 90,824          | 90,824                    | 90,824                |

Source: Brazilian National Health Survey *Pesquisa Nacional de Saúde* (PNS) 2019. APR–Adjusted prevalence ratio; 95%CI– 95% Confidence interval; Ref–Reference category

\* $p < 0.05$

\*\* $p < 0.01$

\*\*\* $p < 0.001$

Low Vegetables Consumption–Vegetables consumption <5 days per week; Low Fruits Consumption–Fruits consumption <5 days per week; High Red Meat Consumption–Red meat consumption  $\geq 3$  days per week; Currently Smoke–Currently smoke tobacco; Heavy Alcohol Consumption–Alcohol consumption  $\geq 4$  per day; Low Physical Exercise–Exercise <150 minutes per week.

<https://doi.org/10.1371/journal.pgph.0000990.t004>

inactivity). Compared to non-slum urban populations, there were no differences in the likelihood of doctor-diagnosed metabolic risk factors or CVD for slum populations, however rural populations had a lower prevalence across all metabolic risk factors and CVD. Sizeable SES inequalities in CVD risk factors and doctor-diagnosed CVD exist in Brazil by sex, race, education and income.

The findings of an association between slum residence and higher rates of behavioural CVD risk factors (which persisted after adjusting for socioeconomic factors) is generally concordant with other studies and are likely to be partially explained by the slum environment. Studies from Kenyan and Nepalese slums found slum populations reported lower fruits and vegetables consumption, higher heavy alcohol consumption, and more physical inactivity [56,57]. Low fruits and vegetables consumption suggest barriers to accessing healthy foods in slums [58]. Poor transport infrastructure, limited public services and unsafe neighbourhoods in slums have been found to affect local food availability [17,59]. Violence can also deter local businesses and violent drug-related crime is a particular challenge in Brazilian *favelas* [60]. Violence and unsafe neighbourhoods can also deter exercise–concordant with evidence from Kenyan slums [58]. Furthermore, the high population density of slums limits space for exercise and gyms in slums are often unaffordable or unavailable [20]. In this study, slum dwellers were also more likely to have excessive alcohol consumption–similar to evidence from Indian slums [61]. In Brazil, the availability and advertisement of alcohol is widespread, with alcohol consumption increasing over the last decade [40]. Stress from poor quality housing and insecure neighbourhoods may contribute to increased alcohol consumption [62,63].

In adjusted models, there were no differences between slum dwellers and urban non-slum residents in the likelihood of being overweight or having doctor-diagnosed hypertension, diabetes, high cholesterol, or CVD. However, there was a significantly reduced prevalence in the rural population of these metabolic risk factors. This suggests socioeconomic factors, such as

Table 5. Poisson regression models on the association between slums and metabolic cardiovascular disease risk factors.

|                                    | Overweight  | Hypertension | Diabetes    | High Cholesterol | CVD         |
|------------------------------------|-------------|--------------|-------------|------------------|-------------|
|                                    | APR         | APR          | APR         | APR              | APR         |
|                                    | 95%CI       | 95%CI        | 95%CI       | 95%CI            | 95%CI       |
| <b>Area</b>                        |             |              |             |                  |             |
| Non-slum urban (Ref)               | 1           | 1            | 1           | 1                | 1           |
| Slum                               | 0.992       | 0.987        | 1.030       | 1.044            | 1.006       |
|                                    | 0.966–1.019 | 0.941–1.034  | 0.942–1.127 | 0.969–1.125      | 0.891–1.136 |
| Rural                              | 0.890***    | 0.908***     | 0.731***    | 0.911*           | 0.791***    |
|                                    | 0.865–0.916 | 0.871–0.946  | 0.665–0.804 | 0.847–0.980      | 0.711–0.881 |
| <b>Sex</b>                         |             |              |             |                  |             |
| Male (Ref)                         | 1           | 1            | 1           | 1                | 1           |
| Female                             | 0.967**     | 1.262***     | 1.097*      | 1.413***         | 0.923       |
|                                    | 0.947–0.988 | 1.218–1.309  | 1.013–1.189 | 1.334–1.497      | 0.846–1.007 |
| <b>Age</b>                         |             |              |             |                  |             |
| 15–29 (Ref)                        | 1           | 1            | 1           | 1                | 1           |
| 30–39                              | 1.676***    | 3.026***     | 3.017***    | 1.682***         | 1.690**     |
|                                    | 1.610–1.745 | 2.624–3.489  | 2.215–4.110 | 1.421–1.991      | 1.233–2.315 |
| 40–49                              | 1.784***    | 5.756***     | 5.557***    | 2.953***         | 2.866***    |
|                                    | 1.710–1.861 | 4.984–6.647  | 4.171–7.405 | 2.527–3.451      | 2.159–3.804 |
| 50–59                              | 1.765***    | 9.358***     | 11.40***    | 4.434***         | 5.266***    |
|                                    | 1.686–1.847 | 8.248–10.62  | 8.556–15.18 | 3.808–5.164      | 4.029–6.883 |
| 60–69                              | 1.797***    | 12.53***     | 16.00***    | 5.191***         | 7.234***    |
|                                    | 1.715–1.883 | 11.06–14.20  | 12.06–21.23 | 4.447–6.061      | 5.502–9.511 |
| 70+                                | 1.582***    | 14.30***     | 16.40***    | 4.446***         | 10.38***    |
|                                    | 1.500–1.669 | 12.60–16.22  | 12.17–22.10 | 3.756–5.262      | 7.895–13.65 |
| <b>Race/ethnicity</b>              |             |              |             |                  |             |
| White (Ref)                        | 1           | 1            | 1           | 1                | 1           |
| Black                              | 1.036*      | 1.188***     | 1.120       | 0.951            | 0.996       |
|                                    | 1.002–1.071 | 1.122–1.257  | 0.999–1.255 | 0.862–1.051      | 0.878–1.131 |
| Pardo/mixed (Brown)                | 1.008       | 1.079***     | 1.069       | 0.980            | 0.954       |
|                                    | 0.984–1.033 | 1.038–1.122  | 0.984–1.161 | 0.922–1.041      | 0.869–1.047 |
| Other                              | 0.932       | 1.143*       | 1.445*      | 1.005            | 0.964       |
|                                    | 0.825–1.053 | 1.007–1.297  | 1.064–1.962 | 0.780–1.295      | 0.668–1.392 |
| <b>Education level</b>             |             |              |             |                  |             |
| Illiterate (Ref)                   | 1           | 1            | 1           | 1                | 1           |
| Elementary education               | 1.052**     | 1.050*       | 0.998       | 1.037            | 1.075       |
|                                    | 1.010–1.097 | 1.003–1.099  | 0.896–1.113 | 0.949–1.133      | 0.950–1.216 |
| High school education              | 1.077**     | 0.944*       | 0.794**     | 0.947            | 0.973       |
|                                    | 1.026–1.130 | 0.887–1.004  | 0.690–0.913 | 0.852–1.052      | 0.828–1.143 |
| Higher education                   | 1.156*      | 0.841***     | 0.624***    | 0.966            | 0.905       |
|                                    | 1.003–1.112 | 0.779–0.908  | 0.520–0.748 | 0.859–1.086      | 0.751–1.091 |
| <b>Currently employed</b>          |             |              |             |                  |             |
| Yes (Ref)                          | 1           | 1            | 1           | 1                | 1           |
| No                                 | 0.931***    | 1.159***     | 1.426***    | 1.194***         | 1.644***    |
|                                    | 0.904–0.959 | 1.106–1.215  | 1.290–1.577 | 1.121–1.272      | 1.479–1.827 |
| <b>Household income per capita</b> |             |              |             |                  |             |
| ≤ half minimum wage (Ref)          | 1           | 1            | 1           | 1                | 1           |
| > half but ≤ 1 minimum wage        | 1.041**     | 1.030        | 1.002       | 1.115*           | 1.065       |

(Continued)

Table 5. (Continued)

|                               | Overweight  | Hypertension | Diabetes    | High Cholesterol | CVD         |
|-------------------------------|-------------|--------------|-------------|------------------|-------------|
|                               | APR         | APR          | APR         | APR              | APR         |
|                               | 95%CI       | 95%CI        | 95%CI       | 95%CI            | 95%CI       |
|                               | 1.012–1.070 | 0.974–1.089  | 0.904–1.111 | 1.021–1.217      | 0.936–1.212 |
| > 1 but ≤ 2 minimum wage      | 1.065***    | 0.989        | 0.955       | 1.188***         | 0.970       |
|                               | 1.031–1.100 | 0.938–1.042  | 0.852–1.070 | 1.089–1.295      | 0.843–1.117 |
| > 2 minimum wage              | 1.035       | 0.975        | 1.040       | 1.309***         | 0.973       |
|                               | 0.998–1.074 | 0.912–1.042  | 0.891–1.214 | 1.173–1.462      | 0.820–1.155 |
| <b>Number of observations</b> | 89,933      | 88,714       | 84,052      | 82,860           | 90,824      |

Source: Brazilian National Health Survey *Pesquisa Nacional de Saúde* (PNS) 2019. APR—Adjusted prevalence ratio; 95%CI— 95% Confidence interval; Ref—Reference category

\* $p < 0.05$

\*\* $p < 0.01$

\*\*\* $p < 0.001$

CVD—doctor-diagnosed with either heart disease or stroke.

<https://doi.org/10.1371/journal.pgph.0000990.t005>

age, sex, income, education and employment are more important determinants of these risk factors than household location. Other studies show similar results, including from the *favela* Pau da Lima in Salvador which reported the prevalence of diagnosed hypertension or high cholesterol was no different between the urban slum and non-slum [17]. Evidence from some Kenyan slums showed that the majority of the population had low CVD risk [23], whilst in Haiti, slum populations had a low prevalence of obesity and diabetes [64]. One explanation could relate to survey questions asking if conditions were doctor diagnosed, and socio-cultural attitudes may reduce healthcare use and diagnosis, resulting in under-estimation of the true prevalence in slum and rural populations [10,11,65,66]. For example, if community members are of similarly poor health, risk factors and symptoms can become the norm making atypical symptoms hard to recognise—particularly relevant in slums with overcrowding and increased environmental risk factors [64–67]. Precarious employment, which is likely associated with slum residence, can also inhibit healthcare seeking, even if direct costs of healthcare are low as in Brazil [68,69]. In Brazil, barriers to accessing high-quality care remain and are associated with SES, affecting the likelihood of diagnoses [70]. This likely explains the lower prevalence of metabolic risk factors or CVD in rural populations. For example, accessibility and quality of care are likely correlated with neighbourhood factors such as violence, poverty, transport, geographical remoteness, and other local services [67,71]. Public health services in Brazil, particularly in rural or poor urban areas, are often short-staffed, reducing quality and can result in misdiagnoses and inadequate treatment [66,72]. These factors may also explain some of the differences found by region.

This study found strong socioeconomic patterning across other characteristics, in line with other evidence. For example, increasing education and income were generally associated with lower CVD behavioural risk factors, and a lower likelihood of being hypertensive or diabetic. This patterning is generally found in other contexts and countries [12,41,57,73,74]. Men were more likely to smoke, have diets low in fruits and vegetables, and be physically active—consistent with other studies in Brazil [40]. Other studies also find individuals identifying as of Black or *Pardo*/mixed ethnicity/skin colour have higher prevalence of the behavioural risk factors, hypertension and obesity [41]. This likely stems from additional accumulation of social disadvantage from institutional and structural racism in Brazil [74,75].

This study has limitations. First, the data is self-reported and subject to recall and reporting biases. Second, the cross-sectional nature of this study precludes causal interpretation of the associations found and unmeasured factors could potentially explain the findings. Third, the identification of slum inhabitants involved adapting survey questions resulting in potential for misclassification. While no validation studies of this approach for identifying slum inhabitants have been carried out, we used the UN-Habitat definition, which is widely accepted and has been used in previously published work for assessing slum populations and their health [13,49,50,76,77]. Fourth, the reliance on “doctor-diagnosed” to ascertain health conditions likely does not capture true prevalence—especially for lower SES individuals. Fifth, important CVD risk factors were not included in the survey such as a family history of CVDs, and there is scope for further research on other risk factors. Six, some of the survey questions only captured broad measures of food consumption or risk factors, such as only asking the number of alcoholic drinks consumed and not the alcohol type or only the number of study years and not the quality of education received.

There are policy and clinical implications for this work. People living in slums are more likely to be Black or *Pardo*, of lower income, and with lower levels of education. With their poorer health outcomes, they should be better targeted and monitored by health services. Higher rates of some behavioural risk factors, not explained by SES, in slum populations should be a target of public health and clinical interventions that, if properly tailored, can have a positive impact. Existing programmes such as supervised physical training through the ‘Carioca Academy Program’ in Rio de Janeiro have already shown to reduce CVD risk [78]. Policies such as the National School Meal Programme in Brazil have resulted in greater access to healthier foods, improved nutrition education and the promotion of local family farming [79,80]. There is also a potentially higher burden of undiagnosed CVD and metabolic risk factors in slum populations. Lack of data on informal urban settlements and the health profiles of these populations means local healthcare services can be poorly targeted, inadequate or culturally inappropriate [81]. Further research should better investigate the specific factors driving poorer behavioural risk factors in slums and also wider inequalities. It is important to understand why greater behavioural risk factors do not translate into higher rates of diagnosed metabolic risk factors within slums, including identifying the roles of health services and environmental factors. Lastly, there should be attention and research involving individuals in non-permanent housing to better understand slum health and the health of the most deprived, vulnerable populations.

## Conclusion

Individuals living in slum populations have higher rates of behavioural CVD risk factors, but similar rates of doctor-diagnosed metabolic risk factors and CVD to urban non-slum populations. Slum environments are likely risk factors for poorer behavioural health outcomes. Large inequalities in both behavioural and metabolic risk factors exist across other socioeconomic characteristics in Brazil. Tackling socioeconomic inequalities in CVD risk factors remains a priority including addressing the factors driving poorer health behaviours in slum populations.

## Supporting information

**S1 Fig. Figures on post-regression predicted prevalence of risk factors by region and area of residence (urban slum, urban non-slum, rural).**

(DOCX)

**S1 Table. Unadjusted regression models on the association between slums and behavioural cardiovascular disease risk factors.**

(DOCX)

**S2 Table. Unadjusted regression models on the association between slums and metabolic cardiovascular disease risk factors.**

(DOCX)

**S3 Table. STROBE checklist for cross-sectional studies.**

(DOC)

## Acknowledgments

JC would like to thank Dr Oyinlola Oyeboode, Mrs Marylois Beard, Miss Aditi Rajgopal, Miss Mia Wong, Mr Shinya Monno, and Mr Sam Wong for all their help, assistance and encouragement.

## Author Contributions

**Conceptualization:** Jasper J. L. Chan, Linh Tran-Nhu, Charlie F. M. Pitcairn, Thomas V. Hone.

**Data curation:** Thomas V. Hone.

**Formal analysis:** Jasper J. L. Chan, Anthony A. Laverty, Thomas V. Hone.

**Investigation:** Jasper J. L. Chan.

**Methodology:** Jasper J. L. Chan, Charlie F. M. Pitcairn, Thomas V. Hone.

**Project administration:** Jasper J. L. Chan, Thomas V. Hone.

**Supervision:** Thomas V. Hone.

**Writing – original draft:** Jasper J. L. Chan, Linh Tran-Nhu.

**Writing – review & editing:** Jasper J. L. Chan, Linh Tran-Nhu, Charlie F. M. Pitcairn, Anthony A. Laverty, Matías Mrejen, Julia M. Pescarini, Thomas V. Hone.

## References

1. Kelly BB, Narula J, Fuster V. Recognizing global burden of cardiovascular disease and related chronic diseases. *Mt Sinai J Med.* 2012; 79 (6): 632–640. <https://doi.org/10.1002/msj.21345> PMID: 23239202
2. Wahdan MH. The epidemiological transition. *East Mediterr Health J.* 1996; 2 (1): 8–20. [Cited Feb 13, 2021]. Available from: [https://apps.who.int/iris/bitstream/handle/10665/118829/emhj\\_1996\\_2\\_1\\_8\\_20.pdf?sequence=1&isAllowed=y](https://apps.who.int/iris/bitstream/handle/10665/118829/emhj_1996_2_1_8_20.pdf?sequence=1&isAllowed=y).
3. World Health Organization. Cardiovascular diseases (CVDs). [Cited Feb 27, 2021]. Available from: [https://www.who.int/news-room/fact-sheets/detail/cardiovascular-diseases-\(cvds\)](https://www.who.int/news-room/fact-sheets/detail/cardiovascular-diseases-(cvds)).
4. Gheorghe A, Griffiths U, Murphy A, Legido-Quigley H, Lamptey P, Perel P. The economic burden of cardiovascular disease and hypertension in low- and middle-income countries: a systematic review. *BMC Public Health.* 2018; 18 (1): 975. <https://doi.org/10.1186/s12889-018-5806-x> PMID: 30081871
5. Hajar R. Risk Factors for Coronary Artery Disease: Historical Perspectives. *Heart Views.* 2017; 18 (3): 109–114. [https://doi.org/10.4103/HEARTVIEWS.HEARTVIEWS\\_106\\_17](https://doi.org/10.4103/HEARTVIEWS.HEARTVIEWS_106_17) PMID: 29184622
6. Yusuf S, Joseph P, Rangarajan S, Islam S, Mente A, Hystad P, et al. Modifiable risk factors, cardiovascular disease, and mortality in 155 722 individuals from 21 high-income, middle-income, and low-income countries (PURE): a prospective cohort study. *Lancet.* 2020; 395 (10226): 795–808. [https://doi.org/10.1016/S0140-6736\(19\)32008-2](https://doi.org/10.1016/S0140-6736(19)32008-2) PMID: 31492503

7. Paynter NP, Kiefe CI, Lewis CE, Loria CM, Goff DC, Lloyd-Jones DM. Accumulation of metabolic cardiovascular risk factors in black and white young adults over 20 years. *J Am Heart Assoc.* 2015; 4 (4): e001548. <https://doi.org/10.1161/JAHA.114.001548> PMID: 25911605
8. Mahmood SS, Levy D, Vasan RS, Wang TJ. The Framingham Heart Study and the epidemiology of cardiovascular disease: a historical perspective. *Lancet.* 2014; 383 (9921): 999–1008. [https://doi.org/10.1016/S0140-6736\(13\)61752-3](https://doi.org/10.1016/S0140-6736(13)61752-3) PMID: 24084292
9. Unwin N, Alberti, K. G. M. M. Chronic non-communicable diseases. *Ann Trop Med Parasitol.* 2006; 100 (5–6): 455–464. <https://doi.org/10.1179/136485906X97453> PMID: 16899148
10. Hoffmann IS, Cubeddu LX. Clustering of silent cardiovascular risk factors in apparently healthy Hispanics. *J Hum Hypertens.* 2002; 16 (S1): S137. <https://doi.org/10.1038/sj.jhh.1001360> PMID: 11986912
11. Wall HK, Hannan JA, Wright JS. Patients With Undiagnosed Hypertension. *JAMA.* 2014; 312 (19): 1973–1974. <https://doi.org/10.1001/jama.2014.15388> PMID: 25399269
12. Malta DC, Bernal RT, de Souza MF, Szwarcwald CL, Lima MG, Barros MB. Social inequalities in the prevalence of self-reported chronic non-communicable diseases in Brazil: national health survey 2013. *Int J Equity Health.* 2016; 15 (1): 153. <https://doi.org/10.1186/s12939-016-0427-4> PMID: 27852264
13. Ezeh A, Oyebo O, Satterthwaite D, Chen Y, Ndugwa R, Sartori J, et al. The history, geography, and sociology of slums and the health problems of people who live in slums. *Lancet.* 2017; 389 (10068): 547–558. [https://doi.org/10.1016/S0140-6736\(16\)31650-6](https://doi.org/10.1016/S0140-6736(16)31650-6) PMID: 27760703
14. Hone T, Saraceni V, Coeli CM, Trajman A, Rasella D, Millett C, et al. Primary healthcare expansion and mortality in Brazil's urban poor: A cohort analysis of 1.2 million adults. *PLoS Med.* 2020; 17 (10): e1003357. <https://doi.org/10.1371/journal.pmed.1003357> PMID: 33125387
15. United Nations Human Settlement Programme (UN-Habitat). Distinguishing slum from non-slum areas to identify occupants' issues. 2017. [Cited Feb 6, 2021]. Available from: <https://unhabitat.org/distinguishing-slum-from-non-slum-areas-to-identify-occupants-issues>.
16. Khan MMH, Khan A, Kraemer A, Mori M. Prevalence and correlates of smoking among urban adult men in Bangladesh: slum versus non-slum comparison. *BMC Public Health.* 2009; 9 (1): 149. <https://doi.org/10.1186/1471-2458-9-149> PMID: 19463157
17. Snyder RE, Rajan JV, Costa F, Lima HCAV, Calcagno JI, Couto RD, et al. Differences in the Prevalence of Non-Communicable Disease between Slum Dwellers and the General Population in a Large Urban Area in Brazil. *Trop Med Infect Dis.* 2017; 2 (3): 47. <https://doi.org/10.3390/tropicalmed2030047> PMID: 30270904
18. Lumagbas LB, Coleman HLS, Bunders J, Pariente A, Belonje A, de Cock Buning T. Non-communicable diseases in Indian slums: re-framing the Social Determinants of Health. *Glob Health Action.* 2018; 11 (1): 1438840. <https://doi.org/10.1080/16549716.2018.1438840> PMID: 29589512
19. Khayat S, Dolatian M, Navidian A, Mahmoodi Z, Sharifi N, Kasaeian A. Lifestyles in suburban populations: A systematic review. *Electron Physician.* 2017; 9 (7): 4791–4800. <https://doi.org/10.19082/4791> PMID: 28894537
20. Alves J, Figueiroa J, Alves L. Prevalence and Predictors of Physical Inactivity in a Slum in Brazil. *J Urban Health.* 2011; 88 (1): 168–175. <https://doi.org/10.1007/s11524-010-9531-8> PMID: 21274645
21. Naik BN, Selvaraj K, Daya P, Kar SS. Are the urban slum population physically inactive? A descriptive study from urban Puducherry. *J Clin Prev Cardiol.* 2020; 9 (1): 13. [https://doi.org/10.4103/JCPC.JCPC\\_47\\_19](https://doi.org/10.4103/JCPC.JCPC_47_19)
22. Unger A, Felzemburgh R, Snyder R, Ribeiro G, Mohr S, Costa V, et al. Hypertension in a Brazilian Urban Slum Population. *J Urban Health.* 2015; 92 (3): 446–459. <https://doi.org/10.1007/s11524-015-9956-1> PMID: 25920334
23. Vusirikala A, Wekesah F, Kyobutungi C, Oyebo O. Assessment of cardiovascular risk in a slum population in Kenya: use of World Health Organisation/International Society of Hypertension (WHO/ISH) risk prediction charts—secondary analyses of a household survey. *BMJ Open.* 2019; 9 (9): e029304. <https://doi.org/10.1136/bmjopen-2019-029304> PMID: 31488481
24. Dahlgren G, Whitehead M. Policies and strategies to promote social equity in health. Background document to WHO—Strategy paper for Europe. Institute for Futures Studies. 2007.
25. Marmot M. Fair society, healthy lives: the Marmot Review: strategic review of health inequalities in England post-2010. Department for International Development. 2010.
26. Rosengren A, Smyth A, Rangarajan S, Ramasundarahettige C, Bangdiwala SI, AlHabib KF, et al. Socioeconomic status and risk of cardiovascular disease in 20 low-income, middle-income, and high-income countries: the Prospective Urban Rural Epidemiologic (PURE) study. *Lancet. Global Health.* 2019; 7 (6): e748–e760. [https://doi.org/10.1016/S2214-109X\(19\)30045-2](https://doi.org/10.1016/S2214-109X(19)30045-2) PMID: 31028013
27. Kim YJ, Lee JS, Park J, Choi DS, Kim DM, Lee K, et al. Trends in socioeconomic inequalities in five major risk factors for cardiovascular disease in the Korean population: a cross-sectional study using



- data from the Korea National Health and Nutrition Examination Survey, 2001–2014. *BMJ Open*. 2017; 7 (5): e014070. <https://doi.org/10.1136/bmjopen-2016-014070> PMID: 28515188
28. Schultz WM, Kelli HM, Lisko JC, Varghese T, Shen J, Sandesara P, et al. Socioeconomic Status and Cardiovascular Outcomes: Challenges and Interventions. *Circulation*. 2018; 137 (20): 2166–2178. <https://doi.org/10.1161/CIRCULATIONAHA.117.029652> PMID: 29760227
  29. Smith P. A Vicious Circle: Poverty and Noncommunicable Diseases. [Cited Mar 20, 2021]. Available from: <https://magazine.jhsph.edu/2019/vicious-circle-poverty-and-noncommunicable-diseases>.
  30. United Nations. WORLD SOCIAL REPORT 2020 INEQUALITY IN A RAPIDLY CHANGING WORLD. United Nations. 2020.
  31. Anand S, Bradshaw C, Prabhakaran D. Prevention and management of CVD in LMICs: why do ethnicity, culture, and context matter? *BMC Med*. 2020; 18 (1): 7. <https://doi.org/10.1186/s12916-019-1480-9> PMID: 31973762
  32. Hamid H, Abid Z, Amir A, Rehman TU, Akram W, Mehboob T. Current burden on healthcare systems in low-and-middle-income countries: recommendations for emergency care of COVID-19. *Drugs Ther Perspect*. 2020; 36: 466–468. <https://doi.org/10.1007/s40267-020-00766-2> PMID: 32837195
  33. Landmann-Szwarcwald C, Macinko J. A panorama of health inequalities in Brazil. *Int J Equity Health*. 2016; 15 (1): 174. <https://doi.org/10.1186/s12939-016-0462-1> PMID: 27852273
  34. GBD 2016 Brazil Collaborators. Burden of disease in Brazil, 1990–2016: a systematic subnational analysis for the Global Burden of Disease Study 2016. *Lancet*. 2018; 392 (10149): 760–775. [https://doi.org/10.1016/S0140-6736\(18\)31221-2](https://doi.org/10.1016/S0140-6736(18)31221-2) PMID: 30037735
  35. World Health Organization. Noncommunicable diseases country profiles 2018. World Health Organization. 2018.
  36. World Bank. Gini index (World Bank estimate)—Brazil. [Cited Feb 27, 2021]. Available from: <https://data.worldbank.org/indicator/SI.POV.GINI?locations=BR>.
  37. Indio C. Extreme poverty on the rise in Brazil. [Cited Feb 27, 2021]. Available from: <https://agenciabrasil.ebc.com.br/en/economia/noticia/2018-12/extreme-poverty-rise-brazil>.
  38. Agência de Notícias. Summary of Social Indicators: figures indicate increase of poverty between 2016 and 2017. [Cited Mar 20, 2021]. Available from: <https://agenciadenoticias.ibge.gov.br/en/agencia-press-room/2185-news-agency/releases-en/23302-summary-of-social-indicators-figures-indicate-increase-of-poverty-between-2016-and-2017>.
  39. World Bank. Population living in slums (% of urban population)—Brazil. [Cited Feb 6, 2021]. Available from: <https://data.worldbank.org/indicator/EN.POP.SLUM.UR.ZS?end=2018&locations=BR&start=1990>.
  40. de Azevedo Barros MB, Lima MG, Medina LP, Szwarcwald CL, Malta DC. Social inequalities in health behaviors among Brazilian adults: National Health Survey, 2013. *Int J Equity Health*. 2016; 15 (1): 148. Available from: <https://doi.org/10.1186/s12939-016-0439-0> PMID: 27852275
  41. United Nations. THE 17 GOALS. [Cited Mar 20, 2021]. Available from: <https://sdgs.un.org/goals>.
  42. Instituto Brasileiro de Geografia e Estatística—IBGE. Concepts and methods—2019 Perception of health condition, lifestyle, chronic diseases and oral health. [Cited Mar 21, 2021]. Available from: <https://www.ibge.gov.br/en/statistics/social/justice-and-security/16840-national-survey-of-health.html?edicao=29474&t=conceitos-e-metodos>.
  43. Instituto Brasileiro de Geografia e Estatística—IBGE. Pesquisa Nacional de Saúde 2019 Percepção do estado de saúde, estilos de vida, doenças crônicas e saúde bucal. Aline Carneiro Damacena e Leonardo Martins—Gerência de Editoração. 2020.
  44. Piano MR. Alcohol's Effects on the Cardiovascular System. *Alcohol Res*. 2017; 38 (2): 219–241. PMID: 28988575.
  45. Emberson JR, Bennett DA. Effect of alcohol on risk of coronary heart disease and stroke: causality, bias, or a bit of both? *Vasc Health Risk Manag*. 2006; 2 (3): 239–249. <https://doi.org/10.2147/vhrm.2006.2.3.239> PMID: 17326330
  46. National Institute on Alcohol Abuse and Alcoholism. Drinking Levels Defined. [Cited Apr 28, 2021]. Available from: <https://www.niaaa.nih.gov/alcohol-health/overview-alcohol-consumption/moderate-binge-drinking>.
  47. World Health Organization. Physical activity. [Cited Mar 29, 2021]. Available from: <https://www.who.int/news-room/fact-sheets/detail/physical-activity>.
  48. World Health Organization. Obesity and overweight. [Cited Mar 29, 2021]. Available from: <https://www.who.int/news-room/fact-sheets/detail/obesity-and-overweight>.

49. Pitcairn CFM, Laverty AA, Chan JLL, Oyebode O, Mrejen M, Pescarini J, et al. Inequalities in the prevalence of major depressive disorder in Brazilian slum populations: a cross-sectional analysis. *Epidemiol Psychiatr Sci.* 2021; 30: e66. <https://doi.org/10.1017/S204579602100055X> PMID: 34670640
50. Brotherhood L, Cavalcanti T, Da Mata D, Santos C. Slums and pandemics. *J Dev Econ.* 2022; 157 (102882). <https://doi.org/10.1016/j.jdeveco.2022.102882> PMID: 35463050
51. United Nations Human Settlement Programme (UN-Habitat). SDG Indicator 11.1.1 Training Module: Adequate Housing and Slum Upgrading. UN-Habitat. 2018. [Cited Mar 29, 2021]. Available from: [https://unhabitat.org/sites/default/files/2020/06/indicator\\_11.1.1\\_training\\_module\\_adequate\\_housing\\_and\\_slum\\_upgrading.pdf](https://unhabitat.org/sites/default/files/2020/06/indicator_11.1.1_training_module_adequate_housing_and_slum_upgrading.pdf).
52. UN-Habitat. Slum Almanac 2015/2016 Tracking Improvements in the Lives of Slum Dwellers. UN-Habitat. 2016.
53. Organisation for Economic Co-operation and Development. Real Minimum Wages. [Cited Oct 8, 2021]. Available from: <https://stats.oecd.org/index.aspx?DataSetCode=RMW>.
54. Andrade MV, Coelho AQ, Xavier Neto M, Carvalho LR, Atun R, Castro MC. Brazil's Family Health Strategy: factors associated with programme uptake and coverage expansion over 15 years (1998–2012). *Health Policy Plan.* 2018; 33 (3): 368–380. <https://doi.org/10.1093/heapol/czx189> PMID: 29346551
55. Wadge H, Bhatti Y, Carter A, Harris M, Parston G, Darzi A. Brazil's Family Health Strategy: Using Community Health Care Workers to Provide Primary Care. [Cited May 14, 2021]. Available from: <https://www.commonwealthfund.org/publications/case-study/2016/dec/brazils-family-health-strategy-using-community-health-care-workers>.
56. Haregu TN, Oti S, Egondi T, Kyobutungi C. Co-occurrence of behavioral risk factors of common non-communicable diseases among urban slum dwellers in Nairobi, Kenya. *Glob Health Action.* 2015; 8: 28697. <https://doi.org/10.3402/gha.v8.28697> PMID: 26385542
57. Oli N, Vaidya A, Thapa G. Behavioural Risk Factors of Noncommunicable Diseases among Nepalese Urban Poor: A Descriptive Study from a Slum Area of Kathmandu. *Epidemiol Res Int.* 2013; 2013: e329156. <https://doi.org/10.1155/2013/329156>
58. Wekesah FM, Kyobutungi C, Grobbee DE, Klipstein-Grobusch K. Understanding of and perceptions towards cardiovascular diseases and their risk factors: a qualitative study among residents of urban informal settings in Nairobi. *BMJ Open.* 2019; 9 (6): e026852. <https://doi.org/10.1136/bmjopen-2018-026852> PMID: 31209088
59. Foundation Rockefeller. Decision Intelligence Document Constrained Opportunities in Slum Economies. [Presentation] Rockefeller Foundation. November 2013. [Cited May 14, 2021]. Available from: <https://www.rockefellerfoundation.org/wp-content/uploads/Constrained-Opportunities-in-Slum-Economies.pdf>.
60. Human Rights Watch. Fighting Violence with Violence: Human Rights Abuse and Criminality in Rio de Janeiro. Human Rights Watch. 1996; 8 (2). [Cited May 14, 2021]. Available from: <https://www.hrw.org/legacy/summaries/s.brazil961.html>.
61. Singh PK, Singh N, Jain P, Shukla SK, Singh L, Singh S. Slum and non-slum differences in tobacco and alcohol use among the adult population: a sex-stratified study from eight megacities of India. *J Subst Use.* 2021; 0 (0): 1–10. <https://doi.org/10.1080/14659891.2021.1916849>
62. Dawson DA, Grant BF, Ruan WJ. The association between stress and drinking: modifying effects of gender and vulnerability. *Alcohol Alcohol.* 2005; 40 (5): 453–60. <https://doi.org/10.1093/alcac/agh176> PMID: 15972275
63. Katikireddi SV, Whitley E, Lewsey J, Gray L, Leyland AH. Socioeconomic status as an effect modifier of alcohol consumption and harm: analysis of linked cohort data. *Lancet Public Health.* 2017; 2 (6): e267–e276. [https://doi.org/10.1016/S2468-2667\(17\)30078-6](https://doi.org/10.1016/S2468-2667(17)30078-6) PMID: 28626829
64. McNairy ML, Tymejczyk O, Rivera V, Seo G, Dorélien A, Peck M, et al. High Burden of Non-communicable Diseases among a Young Slum Population in Haiti. *J Urban Health.* 2019; 96 (6): 797–812. <https://doi.org/10.1007/s11524-019-00368-y> PMID: 31218502
65. O'Donnell O. Access to health care in developing countries: breaking down demand side barriers. *Cad Saude Publica.* 2007; 23 (12): 2820–2834. <https://doi.org/10.1590/s0102-311x2007001200003> PMID: 18157324
66. Banerjee A, Bhawalkar JS, Jadhav SL, Rathod H, Khedkar DT. Access to health services among slum dwellers in an industrial township and surrounding rural areas: a rapid epidemiological assessment. *J Family Med Prim Care.* 2012; 1 (1): 20–26. <https://doi.org/10.4103/2249-4863.94444> PMID: 24478995
67. de Oliveira RAD, Duarte CMR, Pavão ALB, Viacava F. Barreiras de acesso aos serviços em cinco Regiões de Saúde do Brasil: percepção de gestores e profissionais do Sistema Único de Saúde. *Cad Saude Publica.* 2019; 35 (11): e00120718. <https://doi.org/10.1590/0102-311X00120718> PMID: 31691779

68. van der Heijden J, Gray N, Stringer B, Rahman A, Akhter S, Kalon S, et al. 'Working to stay healthy', health-seeking behaviour in Bangladesh's urban slums: a qualitative study. *BMC Public Health*. 2019; 19 (600). <https://doi.org/10.1186/s12889-019-6750-0> PMID: 31101099
69. Rocha R, Soares RR. Evaluating the impact of community-based health interventions: evidence from Brazil's Family Health Program. *Health Econ*. 2010; 19: 126–158. <https://doi.org/10.1002/hec.1607> PMID: 20803631
70. Adams AM, Islam R, Yusuf SS, Panasci A, Crowell N. Healthcare seeking for chronic illness among adult slum dwellers in Bangladesh: A descriptive cross-sectional study in two urban settings. *PLoS One*. 2020; 15 (6): e0233635. <https://doi.org/10.1371/journal.pone.0233635> PMID: 32542043
71. Eleone A, Aguillar A, Leal F, Thami H, Remédios J, Machado ML, Freitas Ret al. Linhas de Cuidado de Doenças Crônicas Não Transmissíveis Na Atenção Primária À Saúde. Instituto de Estudos para Políticas de Saúde—IEPS. 2021.
72. Macinko J, Harris MJ. Brazil's family health strategy—delivering community-based primary care in a universal health system. *N Engl J Med*. 2015; 372 (23): 2177–2181. <https://doi.org/10.1056/NEJMp1501140> PMID: 26039598
73. Negesa LB, Magarey J, Rasmussen P, Hendriks JML. Patients' knowledge on cardiovascular risk factors and associated lifestyle behaviour in Ethiopia in 2018: A cross-sectional study. *PLoS One*. 2020; 15 (6): e0234198. <https://doi.org/10.1371/journal.pone.0234198> PMID: 32497079
74. Alves RFS, Faerstein E. Educational inequalities in hypertension: complex patterns in intersections with gender and race in Brazil. *Int J Equity Health*. 2016; 15 (1): 146. <https://doi.org/10.1186/s12939-016-0441-6> PMID: 27852274
75. Macinko J, Mullachery P, Proietti FA, Lima-Costa MF. Who experiences discrimination in Brazil? Evidence from a large metropolitan region. *Int J Equity Health*. 2012; 11: 80. <https://doi.org/10.1186/1475-9276-11-80> PMID: 23249451
76. Hacker KP, Seto KC, Costa F, Corburn J, Reis MG, Ko AI, et al. Urban slum structure: integrating socio-economic and land cover data to model slum evolution in Salvador, Brazil. *Int J Health Geogr*. 2013; 12 (1): 45. <https://doi.org/10.1186/1476-072X-12-45> PMID: 24138776
77. Kuffer M, Thomson DR, Boo G, Mahabir R, Grippa T, Vanhuysse S, et al. The Role of Earth Observation in an Integrated Deprived Area Mapping “System” for Low-to-Middle-Income Countries. *Remote Sens*. 2020; 12 (6): 982. <https://doi.org/10.3390/rs12060982>
78. Lima AM, Werneck AO, Cyrino E, Farinatti P. Supervised training in primary care units but not self-directed physical activity lowered cardiovascular risk in Brazilian low-income patients: a controlled trial. *BMC Public Health*. 2019; 19 (1): 1738. <https://doi.org/10.1186/s12889-019-7716-y> PMID: 31881952
79. Sidaner E, Balaban D, Burlandy L. The Brazilian school feeding programme: an example of an integrated programme in support of food and nutrition security. *Public Health Nutr*. 2013; 16 (6): 989–94. <https://doi.org/10.1017/S1368980012005101> PMID: 23218237
80. Maluf RS, Burlandy L, Santarelli M, Schottz V, Speranza JS. Nutrition-sensitive agriculture and the promotion of food and nutrition sovereignty and security in Brazil. *Cien Saude Colet*. 2015; 20 (8): 2303–12. <https://doi.org/10.1590/1413-81232015208.14032014> PMID: 26221795
81. Snyder RE, Jaimes G, Riley LW, Faerstein E, Corburn J. A comparison of social and spatial determinants of health between formal and informal settlements in a large metropolitan setting in Brazil. *J Urban Health*. 2014; 91 (3): 432–445. <https://doi.org/10.1007/s11524-013-9848-1> PMID: 24297475
